# Supplementary material for: COI-Based DNA Barcoding in Pakistan: Progress, Challenges, and Future Directions
Source: Research Square preprint supplement (doi:10.21203/rs.3.rs-7936079/v1), 2025-10-30
Supplement: Supplementary file 1 [file 3acc922cee7458fcab4eb4a8.docx]

| No. of Samples | Total No of Collection Sites | Article Type | Study Duration | DNA Extraction Source | *Journal Name* | Reference |
| --- | --- | --- | --- | --- | --- | --- |
| 1684 | 491 | Research Article | 2010-2013 | Single Leg | *PLOS One* | (48) |
| 4503 | 329 | Research Article | 2010-2013 | Single Leg | *PLOS One* | (41) |
| 589 | 255 | Research Article | 2010-2013 | Single Leg | *PLOS One* | (8) |
| 60273 | 1858 | Research Article | 2010-2019 | Single Leg | *PeerJ* | (10) |
| 495 | 158 | Research Article | 2009-2012 | Not Provided | *PLOS One* | (9) |
| 1 | Not Mentioned | Research Article | Not Provided | meat | *Journal Of Bioresource Management* | (14) |
| 1795 | 225 | Research Article | 2010-2016 | Single Leg | *PLOS One* | (49) |
| 10792 | 28 | Research Article | 2019-2021 | Single Leg | *PeerJ* | (50) |
| 3 | 1 | Short Communication | Not Provided | gills and caudal region | *Mitochondrial DNA* | (51) |
| 5 | 33 | Research Article | Not Provided | Left Leg | *Pakistan Journal Of Zoology* | (52) |
| 27 | 3 | Research Article | Not Provided | Caudal fin | *Journal Of Bioresource Management* | (53) |
| 10 | Not Mentioned | Research Article | 2012 | Not Provided | *Molecular Biology Reports* | (16) |
|  |  | Research Article | Not Provided | Review Article | *Pak-Euro Journal Of Medical And Life Sciences* | (39) |
| 872 | Not Mentioned | MITO Communication | June-August 2017 | Not Provided | *Mitochondrial DNA Part B* | (54) |
| 53092 | 4 | Research Article | 7 February–13 December 2012, 9 April–3 July 2014, November 2014–February 2015 | leg | *PLOS One* | (55) |
| 4 | 1 | Research Article | Sep-16 | Skin samples | *Nucleosides, Nucleotides And Nucleic Acids* | (26) |
| 35 | 7 | Research Article | Not Provided | Not Provided | *Journal Of King Saud University – Science* | (25) |
| 407 | 107 | Research Article | 2009-2012 | Single Leg | *Molecular Ecology Resources* | (56) |
| 41 | 8 | Research Article | Not Provided | fins | *Diversity* | (57) |
| 342 | 8 | Research Article | May and October in 2020 | Whole body except 1cm anal region | *Journal Of Oleo Science* | (42) |
| 36 | 6 | Research Article | Not Provided | meat, scales, fins | *Pakistan Journal Of Agriculture Sciences* | (58) |
| 59 | 2 | MITO Communication | July-November 2017 | Left Leg | *Mitochondrial DNA Part B Resources* | (59) |
| 75 | 3 | Research Article | Not Provided | fin tissue | *Journal Of King Saud University - Science* | (60) |
| Not Mentioned | 24 | Research Article | Not Provided | larvae | *Indian Journal Of Entomology* | (23) |
|  | Not Mentioned | Research Article | Not Provided | Review Article | *Annals Of Animal Science* | (61) |
| 51 | 3 | Research Article | Not Provided | Not Provided | *Systematic Entomology* | (5) |
| 35 | 52 | Research Article | 2017-2019 | Not Provided | *The Journal Of Animal & Plant Sciences* | (17) |
| 30 | Not Mentioned | Research Article | 2016 | Blood | *Journal Of Bioresource Management* | (15) |
|  | Not Mentioned | Review | Not Provided | Not Provided | *Mitochondrial DNA* | (40) |
| 6 | 6 | Research Article | Not Provided | gills | *LGU Journal Of Life Sciences* | (62) |
| 21 | 5 | Research Article | August 2018-July 2022 | Not Provided | *Journal Of Wildlife And Biodiversity* | (21) |
| 2736 | 6 | Research Article | July-October 2018-2019 | Not Provided | *Punjab University Journal Of Zoology* | (63) |
| 25 | 2 | Research Article | Not Provided | pectoral fins | *International Journal For Multidisciplinary Research (IJFMR)* | (24) |
| Not Mentioned | 1 | Research Article | Not Provided | muscle | *Journal Of Animal & Plant Sciences* | (64) |
| 5 | 2 | Research Article | Not Provided | Blood | *Brazilian Journal Of Biology* | (65) |
| 10653 | 46 | Research Article | Summer 2022 | Not Provided | *PLOS One* | (36) |
| 10 | Not Mentioned | Rapid Communication | Not Provided | Not Provided | *Mitochondrial DNA Part B* | (66) |
| 15 | 1 | Research Article | Not Provided | muscle | *Frontiers In Chemical Sciences* | (67) |
| 12 | 1 | Research Article | Not Provided | (coats, tanned skins) and fur (mufflers) samples | *Mitochondrial DNA Part A* | (18) |
| 784 | 5 | Research Article | April-November 2019 | Not Provided | *PLOS One* | (68) |
| Not Mentioned | 2 | Research Article | Not Provided | Tissues | *Journal Of Biological Regulators & Homeostatic Agents* | (69) |
| 15 | 5 | Research Article | Not Provided | fin tissue | *Philippine Journal of Science* | (70) |
| Not Mentioned | multiple sites | Short Communication | 2017 | Not Provided | *International Journal of Tropical Insect Science* | (71) |
| 30 | Not Mentioned | Research Article | Not Provided | blood | *Acta Entomology and Zoology* | (72) |
| multiple samples | 3 | Short Communication | Not Provided | whole body | *Pakistan Journal of Zoology* | (73) |
| 85 | 19 | Research Article | 2010-2011 | Piece of leg | *Journal Of Threatened Taxa* | (74) |
| Not Mentioned | Not Mentioned | Research Article | May-June 2007 | nymphs/adult females | *Appl. Entomol. Zool.* | (6) |
| multiple samples | multiple sites | Research Article | June 2014-October 2017 | Single Leg | *International Journal Of Bioscience* | (20) |
| 8430 | 1 | Research Article | 11th December 2018 to 10th December 2019 | one or two legs of adults | *Pol. J. Environ. Stud.* | (43) |
| 72 | Not Mentioned | Research Article | Mar-14 | Piece of muscle | *Pakistan Journal Of Zoology* | (75) |
| 8721 | 1 | Research Article | June 2017- May 2018 | Insect body | *Asian J Agric & Biol.* | (76) |
| 31 | 2 | Research Article | July 2020- Marh 2021 | dorsal muscle tissue | *Journal Of Materials And Environmental Science* | (11) |
| 99 | 2 | Research Article | Selected months from 2009, 2012, 2013, 2014, 2015 | Muscle Pieces | *Pakistan Journal Of Zoology* | (37) |
| 1738 | 1 | Research Article | 2017-2018 | Adult leg | *Pakistan Journal Of Zoology* | (77) |
| 8 | 3 | Research Article | 2018 | whole body | *Acta Entomologica Serbica* | (78) |
| 1085 | 1 | Research Article | October-February | Not Provided | *Bioscientific Review* | (79) |
| 17 | 8 | Mitogenome Announcement | 2016 | muscles | *Mitochondrial DNA Part B* | (27) |
| 365 | 6 | Research Article | March-August 2023 | Not Provided | *Journal Of Advanced Zoology* | (80) |
| 94 | 10 | Research Article | April 2021-October 2021 and April 2022- October 2022 | Leg | *Journal Of Applied Research In Plant Sciences* | (81) |
| multiple samples | 1 | Short Communication | Not Provided | Not Provided | *Cellular And Molecular Biology* | (82) |
| 400 | 4 | Research Article | Not Provided | female body | *Annales De La Société Entomologique De France (N.S.),* | (83) |
| 86 | 14 | Rapid Communication | 2019 | fecal, muscle tissue, skin and hair samples | *Mitochondrial DNA Part B* | (19) |
| 300 | 6 | Research Article | Not Provided | Legs | *Acta Tropica* | (46) |
| 25 | 2 | Research Article | 2023 | Whole body | *Frontiers In Veternary Science* | (12) |
| 10 | 1 | Research Article | Not Provided | Muscle | *International Journal Of Applied And Experimental Biology* | (84) |
| multiple samples | 1 | Research Article | Not Provided | muscle tissues | *Current Trends In OMICS (CTO)* | (85) |
| 8641 | 45 | Research Article | April 2017-March 2018 | Not Provided | *Frontiers In Physiology* | (86) |
| 7 | 7 | Research Article | Summer, Spring 2017 | Keel Tissues | *Journal Of Bioresource Management* | (87) |
| multiple samples | 1 | Research Article | Not Provided | Not Provided | *Cellular And Molecular Biology* | (88) |
| multiple samples | 1 | Research Article | 2013-2014 | Blood (wing/leg vein) | *Acta Entomology And Zoology* | (89) |
| multiple samples | 15 | Research Article | September-October | feather follical | *Research Square* | (13) |
| 22 | 4 | Research Article | Not Provided | muscle tissues | *The Journal Of Animal & Plant Sciences* | (90) |
| 160 | 6 | Research Article | March 2014-November 2015 | First Pair of left leg | *Mitochondrial DNA Part A* | (91) |
| 23 | 5 | Research Article | Not Provided | Patagium & hind legs tissue samples | *Brazilian Journal Of Biology* | (92) |
| 542 | 1 | Research Article | 2022 | muscle tissues | *Punjab University Journal Of Zoology* | (93) |
| 3 | 2 | MITO Communication | Not Provided | Muscles | *Mitochondrial DNA Part B* | (94) |
| 240 | 10 | Research Article | 2015-2017 | Thorax | *Applied Ecology And Environmental Research* | (95) |
| 36 | 50 | Research Article | March 2022-March 2023 | Tail tip biopsies, liver and spleen | *Journal Of Wildlife And Biodiversity* | (22) |
| 60 | 19 | Short Communication | Not Provided | Not Provided | *Mitochondrial DNA* | (96) |
| 123 | 1 | Research Article | 2018 | 3rd and 4th legs | *Experimental And Applied Acarology* | (97) |
| 15 | 1 | Rapid Communication | Not Provided | Not Provided | *Mitochondrial DNA Part B* | (98) |
| 14 | 6 | Research Article | July 2022 - July 2023 | muscle tissues | *Journal Of Freshwater Ecology* | (7) |
| 70 | 7 | Research Article | 2023 | Blood Samples | *Scientific Reports* | (99) |
