# Supplementary material for: COI-Based DNA Barcoding in Pakistan: Progress, Challenges, and Future Directions
Source: Research Square preprint supplement (doi:10.21203/rs.3.rs-7936079/v1), 2025-10-30
Supplement: Supplementary file 2 [file 3c9cfedbbe70a8544d6d141d.docx]

**Table 6.** Proposed Checklist for COI-Based DNA Barcoding Studies in Pakistan

| **Category** | **Essential elements** |
| --- | --- |
| Context and Design of Study | - Inclusion of Geographic locations - Presence of coordinates of sampling sites - Duration and seasons of study - Presence of clear objectives |
| Details of Sampling | - Number of samples per species - Site selection rationale and number of sites - Methods of trapping - Statements of ethical approval |
| Handling of Sampling | - Source of tissue for DNA extraction (muscle, fin, leg) - Method of preservation (ethanol etc.) - Voucher specimen in recognized database |
| Molecular Methods | - Extraction Protocol - Primer details - PCR conditions - Sequencing platform |
| Data management | - Explanation of sequence quality control - Submission of sequence/s to BOLD/GenBank - Provision of Accession Numbers |
| Analysis and interpretation | - Models/Software packages used - Genetic distance methods specified - Criteria for species delimitation - Phylogenetic/clustering method used |
| Reporting and transparency | - Limitations of study clearly acknowledged - Methodological details for reproducibility and reliability - Supplementary data including metadata, alignments and trees |
