# Supplementary material for: COI-Based DNA Barcoding in Pakistan: Progress, Challenges, and Future Directions
Source: Research Square preprint supplement (doi:10.21203/rs.3.rs-7936079/v1), 2025-10-30
Supplement: Supplementary file 3 [file 73ac100aef34aa98d9e08098.docx]

| **Trapping Method** | **Advantages** | **Limitations** | **Examples in Data** |
| --- | --- | --- | --- |
| Nets (Sweep Nets, Hand Nets, Fish Nets, Cast Nets, Drag Nets, Cannon Nets) | Mobile species can be captured easily like fish and insects. | specimen may be damaged | Casting, sweep and fish nets |
| Light Traps (with CO₂, UV Illuminated Sheets, Methyl Eugenol Lures) | Beneficial for nocturnal and flying species | Biased toward light sensitive species | CO2-coupled with UV sheet or use of methyl eugenol traps |
| Aspirators | helps to capture beetles and mosquitoes | larger and evasive species may be missed | Portable and battery-operated suction devices |
| Pitfall Traps | Useful for ground-thriving arthropods. | weather-dependent effectiveness | Pitfall traps |
| Malaise Traps | Useful for flying insects like flies and wasps | It is expensive and requires monitoring | Malaise traps |
| Beating Vegetation Over White Paper | Helps to capture arboreal and hidden insects | Difficult for ground living insects | Beating vegetation over white paper |
| Hand Collection | Effective for visible species. | It is laborious work | Snake sticks etc |
| Blood Sampling (Jugular Vein Collection) | Blood collection from vertebrates | Requires expert. | Use of syringes |
| Already Preserved Specimens | Historical studies | DNA quality may be low | Preserved specimen |
| Spray Procedures & Suction Devices | Valuable for cryptic species | May affect DNA quality | Spray procedures, mosquito nets |
| Transect-Based Sampling | Helpful in systematic data collection | Takes long time | Line transect method |
