# Supplementary material for: COI-Based DNA Barcoding in Pakistan: Progress, Challenges, and Future Directions
Source: Research Square preprint supplement (doi:10.21203/rs.3.rs-7936079/v1), 2025-10-30
Supplement: Supplementary file 4 [file 7c33d56b979ef7d543117698.docx]

| **Category** | **Observations** | **Implications** | **Recommendations** |
| --- | --- | --- | --- |
| Geographic Bias | More research output in Punjab while less focus to Balochistan, Gilgit-Baltistan especially | Accessible areas represented more while unique regions ignored. | Work should be expanded to remote and unexplored areas. |
| Ecosystem Coverage | Marine, alpine and deserts have been neglected while rivers and agricultural areas explored potentially | Less data about Marine and high-altitude species. | Protects areas, mountains and unique ecosystems should be focused. |
| Taxonomic Bias | More focus has been given to fish and insects while less to fungi, mammals and microbes. | Key species remain understudied. Limited data about conservation strategies. | Neglected groups like mammals and fungi should be focused. |
| Institutional Constraints | Most research from Punjab-based institutes (UAF, GCU, AARI Faisalabad). Very few studies from other regions or say remote regions. | Institutional bias skews results and questions funding. | Collaboration should be made in universities of Balochistan and Khyber Pakhtunkhwa. |
| Freshwater vs. Marine Sampling | Focal point has been established in rivers like Indus and Chenab while no focus to mangroves and corals | Marine species underrepresented despite long coastline. | Marine biodiversity should be focused. |
| Protected Areas | Limited barcoding from national parks (except Hazarganji-Chiltan, Juniper forests, Dodhial Pheasant Centre, and zoos). | Conservation areas have been ignored. | National parks, Ramsar sites, and wildlife reserves should be sorted out. |
| Cross-Border Research | International collaboration with China, Saudi Arabia, and Egypt | Shared areas not accessed including borders and Indus Delta. | Cross border diversity research should be encouraged with Iran, India, Afghanistan and China. |
| Policy and Conservation Impact | Endemic and endangered species remain unstudied. Conservation efforts are less comparatively. | Data of many species is missing; therefore, inadequate policies are holding. | Threatened, endemic, ecologically important species should be focused. |
