# Supplementary material for: COI-Based DNA Barcoding in Pakistan: Progress, Challenges, and Future Directions
Source: Research Square preprint supplement (doi:10.21203/rs.3.rs-7936079/v1), 2025-10-30
Supplement: Supplementary file 5 [file 8d2c1537a29b97a028dd5b53.docx]

Table 5. The details of Primers used during different studies from Pakistan.

| **Primer Name** | **Primer Length** | **Reference** |
| --- | --- | --- |
| LCO1490 and HCO2198 | Forward primer: 5’-GGTCAACAAATCATAAAGATATTGG-3’  Reverse primer: 5’-TAAACTTCAGGGTGACCAAAAAATCA-3’ | [23, 24] |
| RepCOI-F and RepCOI-R | Forward primer): 5’-TNTTMTCAACNAACCACAAAGA-3’  Reverse primer: 5’-ACTTCTGGRTGKCCAAARAATCA-3’ | [25] |
| C_LepFolF and C_LepFolR  LepF1 and LepR1 | Forward primer: ATTCAACCAATCATAAAGATATTGG  Reverse primer: TAAACTTCTGGATGTCCAAAAAATCA | [20, 26] |
| LepF2_t1 and LepR1 | Forward primer: TGTAAAACGACGGCCAGTAATCATAARGATATYGG  Reverse primer: TAAACTTCTGGATGTCCAAAAAATCA | [26] |
| FishF1 and FishR1 | Forward primer: 5’-TCAACCAACCACAAAGACATTGGCAC-3’  Reverse primer: 5’-TAGACTTCTGGGTGGCCAAAGAATCA-3’ | [27, 28] |
| FishF2 and FishR2 | Forward primer: 5’-TCGACTAATCATAAAGATATCGGCAC-3’  Reverse primer: 5’-ACTTCAGGGTGACCGAAGAATCAGAA-3’ |
| BirdF1 and BirdR1 | Forward primer:TTCTCCAACCACAAAGACATTGGCAC  Reverse primer: ACGTGGGAGATAATTCCAAATCCTG | [19] |
| UniMinibarF1 and UniMinibarR1 | Forward primer:TCCACTAATCACAARGATATTGGTAC  Reverse primer: GAAAATCATAATGAAGGCATGAGC | [29] |
| L-turtCOIF and  H-turtR | Forward primer : TACCTGTGATTTTAACCCGTTGAT  Reverse primer : TGGTGGGCTCATACAATAAAGC | [30] |
