# Supplementary material for: COI-Based DNA Barcoding in Pakistan: Progress, Challenges, and Future Directions
Source: Research Square preprint supplement (doi:10.21203/rs.3.rs-7936079/v1), 2025-10-30
Supplement: Supplementary file 6 [file c49b466b28c06a339c38464f.docx]

| **Classification** | **Congeneric Divergence** | **Conspecific Divergence** | **Most Abundant Species** | **Total Species Identified** |
| --- | --- | --- | --- | --- |
| Mosquitoes | 2.3-17.8% | 0-2.4% | Culex quinquefasciatus (61%) | 32 |
| Lepidoptera, moths | 6.4% (2.7-16.0%) | 0.0-3.3 (<2%) | N/A | 379 species, 52 families |
| Hemiptera: Whitefly *Bemisia tabaci* Complex | N/A | 0.0-19.9% (mean 4%) | N/A | 15 BINs |
| insects | N/A | N/A | N/A | 1364 species, 1375 genera |
| Thrips (Thysanoptera) | 5.6-27% (19% mean) | 0.00-7.6% (mean 7.6%) | N/A | 43 |
| Turtles: *Lissemys punctata* | N/A | N/A | N/A | 1 |
| Arachnida: Spiders | 2.8-23.2 (mean 8.8%) | 0-5.3 (mean 0.8%) | N/A | 27 families, 202 species |
| Arthropods | N/A | N/A | Diptera and Hymenoptera | 324 genera, 191 species |
| Cyprinidae: *C. carpio, C. mrigala*, and *C. idella* | mean 8.45% | mean 0.28% | N/A | 3 |
| Arachnida, Spiders | 17.6-23.7% | 0-1.6% | N/A | 5 |
| Channa Species: *C. punctata, C. marulius and C. striata* | 0.182-0.195 | 0.00-0.023 | N/A | 3 |
| Pakistani collared dove: *Streptopelia decaocto* | N/A | N/A | N/A | 1 |
| Review: family Coccinellidae, ladybird beetles | N/A | N/A | N/A |  |
| spiders | N/A | N/A | Arenidae | 12 families, 29 genra and 49 species |
| Insects | N/A | N/A | Diptera and Hymenoptera | 17 Orders, 254 families |
| *Gazella bennettii and Bos taurus* | N/A | N/A | *Gazella bennettii* and *Bos taurus* | 2 Species |
| *Wallagu atto* | N/A | 0.000-0.038% | Wallagu atto | 1 |
| Butterfly | 1.7 to 14.3% (mean 8.0%) | 0.0 to 1.6% (mean 0.2%) | Nymphalidae | 52 Genera, 81 Species |
| Fishes: Family *Mugilidae* | N/A | N/A | N/A | 7 |
| Pheretimoid Earthworm (*Metaphire* sp. and *Amynthas* sp.) | N/A | 0.0％ to 0.57％ | *Metaphire (Metaphire posthuma)* | 86 pheretimoid complex |
| Cyprinidae | N/A | mean 1.84% | N/A | 9 genera, 9 species |
| insect pests of rice crops | N/A | 0-2.26% | N/A | 11 families, 16 genera, 20 species |
| Cyprinidae: Genus Labeo: *C. catla, L. rohita, L. calbasu, L. gnius, L. bata* | N/A | N/A | N/A | 5 species |
| *Cactus Moth C. cactorum* | N/A | 0.012 to 32.18% | N/A | 1 |
| Fishes | N/A | N/A | N/A |  |
| stink bug genus Halys (Heteroptera: Pentatomidae) | N/A | 0–0.16% | N/A | 2, 1 new |
| Weaving Spider (Araneae: Araneidae) | N/A | N/A | N/A | 11, 6 new species |
| Goat, *Capra hircus* | N/A | N/A | N/A | 2 |
| Review: Services of DNA barcoding in different fields | N/A | N/A | N/A |  |
| Museum Preserved Fish Specimen | N/A | N/A | N/A | 6 |
| Herpetofauna | 0-0.04 in frogs | N/A | N/A | 11 |
| Spiders diversity: 38 morph-species, 22 genera and 8 families | N/A | N/A | Family Araneidae (37.569%) (n=10) | 38 |
| Cyprinidae families: *M. cavasius, M. bleekeri, O. cotio, L. rohita, L. culbasu, L. gonius, C. carpio, C. catla and C. mrigala* | N/A | N/A | N/A | 9 |
| GASTROPOD *Telescopium telescopium* | N/A | N/A | N/A | 1 |
| flying fox | 0.02% | 0.00% | N/A | *Pteropus giganteus* |
| mango fruit flies: *B. dorsalis and B. zonata* | 0.12% | 0.011 and 0.016% | *B*. *dorsalis* in Sindh and *B*. *zonata* in Punjab | 2 |
| genus *Duttaphrynus: D. Stomaticus, D. melanostictus* | 16% | 0-1% for one species and 10-11% for other species | N/A | 2 |
| *Cirrhinus reba* | N/A | N/A | N/A | 1 |
| Illegal trade confiscated samples | N/A | N/A | Vulpes vulpes, | 4 |
| Hymenopteran insects | N/A | N/A | Bethylidae sp. | 13 |
| Bats, Vespertilionidae, Emballonuridae | N/A | N/A | N/A | Not Mentioned |
| *Channa marulius* | 0.0000-0.0067% | N/A | N/A | 1 |
| sugarcane black bug: *Cavelarius excavates* | N/A | N/A | N/A | 1 |
| ring-necked Korean Pheasant, *Phasianus colchicus* | N/A | N/A | N/A |  |
| Hemiptera: Dusky Cotton Bug, *Oxycarenus hyalinipennis* | N/A | N/A | N/A | 1 |
| Acridid Grosshoppers | N/A | N/A | genus *Gastrimargus* | 15 Genera, 26 species morphologically, 21 DNA Barcoding |
| Hemiptera: Pseudococcidae: mealybug *P*. *solenopsis* | N/A | N/A | N/A | 1 |
| Hemiptera: Heteroptera: *Pentatom morpha* | mean 11.7%, 4.1-17.1% | mean 0.7%, 0.0-1.1% | N/A | 13 species, 12 genera |
| Hymenoptera | N/A | N/A | *Camponotus compressus* | 50 species morphologically, 8 spp molecularly |
| Perciformes: Sillaginidae, *Sillago indica* | 17.1-22.2% | mean 0.2% | N/A |  |
| Arthropods diversity | N/A | N/A | *Tricimba humeralis* | 82 |
| *Pseudorhombus arsius, Psettods erumei and Cynoglossus cynoglossus* | N/A | N/A | *Psettods erumei* | 3 |
| Keel Backed *Liza* Species, *Liza affinis, Liza carinata,* and *Liza klunzingeri* | 7.93% | 0.26%, 0.52%, and 0.47% | N/A | 3 |
| Diptera: Tephritidae: Genus *Bactrocera*, *B. zonata, B. Dorsalis, B. cucurbitae* | N/A | N/A | Bactrocera zonata | 3 |
| HEMIPTERA: PYRRHOCORIDAE: *Dysdercus koenigii*, *Dysdercus cingulatus* | N/A | N/A | N/A | 2 |
| Fish Diversity | 0.63% mean | 0.57% mean | *Hypophthalmicthys molitrix* | 22 |
| *S. plagiostomus, S. esocinus, S. progastus, S. niger* | N/A | N/A | S. plagiostomus | 4 |
| Mosquitoes: *Aedes aegypti* and *Culex quinquefasciatus* | N/A | N/A | *Aedes aegypti* | 2 |
| Acrididae (Orthoptera: Caelifera) | N/A | N/A | O*xya hyla hyla* | 7 |
| *Peach Fruit fly, Bactrocera zonata* | N/A | N/A | N/A | 1 |
| *Hemiptera: Pseudococcidae: Phenacoccus solenopsis* | N/A | N/A | N/A | 1 |
| ungulate species: *Moschus cupreus, Muntiacus muntjac, Axis procinus, Axis axis, ntilope cervicapra, Gazella subgutturosa, Gazella bennettii, Boselaphus tragocamelus, Naemorhedus goral bedfordi, Capra aegagrus blythi, Capra sibirica, Capra falconeri falconeri, Capra falconeri megaceros, Pseudois nayaur nayaur, Ovis ammon polii, Ovis vignei punjabiensis, Ovis vignei blanfordi, Ovis vignei vignei, Sus scrofa cristatus* | 0.0025-0.229% | 0-0.0246% | N/A | 19 |
| families Libellulidae and Gomphidae | 37.02% | 0.82-24.96% | Libellulids family | 21 Species and 15 genera |
| *Alectorobius coniceps and* *Dermacentor* species | N/A | N/A | *Alectorobius coniceps* | 2 |
| freshwater catfish: *Wallago attu* | N/A | N/A | N/A | 1 |
| Head Taunsa Barrage Fish Species | 0.99% | 0.97% | N/A | 19 |
| *Rhipicephalus microplus* | N/A | N/A | *R. microplus* | 17 |
| Aves: Columbidae, Pakistan: *C. livia livia, C. eversmanni, S. senegalensis, S. decaocta, S. tranquebarica, S. chinensis, T. phoenicoptera* | N/A | N/A | N/A | 7 |
| dusky cotton bug, *Oxycarenus hyalinipennis* | N/A | N/A | N/A | 1 |
| pheasants of northern Pakistan | N/A | 0.044% to 67.10% | N/A | 7 |
| *Sturnus roseus* | N/A | N/A | N/A | 1 |
| Mahseer *(Tor putitora)* | N/A | 0-0.5% | N/A | 1 |
| family Salticidae and Lycosidae of spiders | N/A | 0.62-1.71% for Lycosidae and 0-2.99% for Salticidae | N/A | 15 |
| insectivorous bat species, *Pipistrellus coromandra* | N/A | mean 0.073% | N/A | 1 |
| Northern Arabian Sea: Rare Fish Diversity | 0.31-4.23% | N/A | N/A | 15 species, 13 families, 7 orders |
| Cyprinids: *Labeo rohita, Catla catla* and *Cirrhinus mrigala* | 1.23% | 0.03% | N/A | 3 |
| *Apis mellifera* | 0.26-2.36% | N/A | N/A | 1 species, 7 subspecies |
| Snake Fauna from Cholistan Desert Pakistan | N/A | N/A | *Eryx johnii*, *Platyceps rhodorachis* | 11 |
| Anopheles mosquitoes | 8-22.3% | 0-2.5% | An. stephensi | 7 |
| *Rhipicephalus microplus* and *Hyalomma anatolicum* collected from cattle | N/A | 6 | N/A | 2 |
| *Catla catla* | 0.43 | 0.38 | N/A | 1 |
| three orders of fish, 8 species | 0.23 | N/A | N/A | 8 |
| common house crows (*Corvus splendens*) | N/A | 0.002-0.013 | N/A | 1 |
